# Supplementary material for: Accounting for three sources of uncertainty in ensemble hydrological forecasting
Source: Copernicus journal article supplement (doi:10.5194/hess-20-1809-2016), 2016-05-10
Supplement: Supplementary file 1 [file hess-20-1809-2016-supplement.zip]

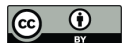

*Supplement of*

## **Accounting for three sources of uncertainty in ensemble hydrological forecasting**

**A. Thiboult et al.**

*Correspondence to:* Antoine Thiboult (antoine.thiboult.1@ulaval.ca)

- [hess-20-1809-2016-supplement-title-page.pdf](#)
- [hess-2015-258-supplement-version3.tar](#)

The copyright of individual parts of the supplement might differ from the CC-BY 3.0 licence.
