# Supplementary figures and images for: Accounting for three sources of uncertainty in ensemble hydrological forecasting
Source: Copernicus journal article supplement (doi:10.5194/hess-20-1809-2016), 2016-05-10

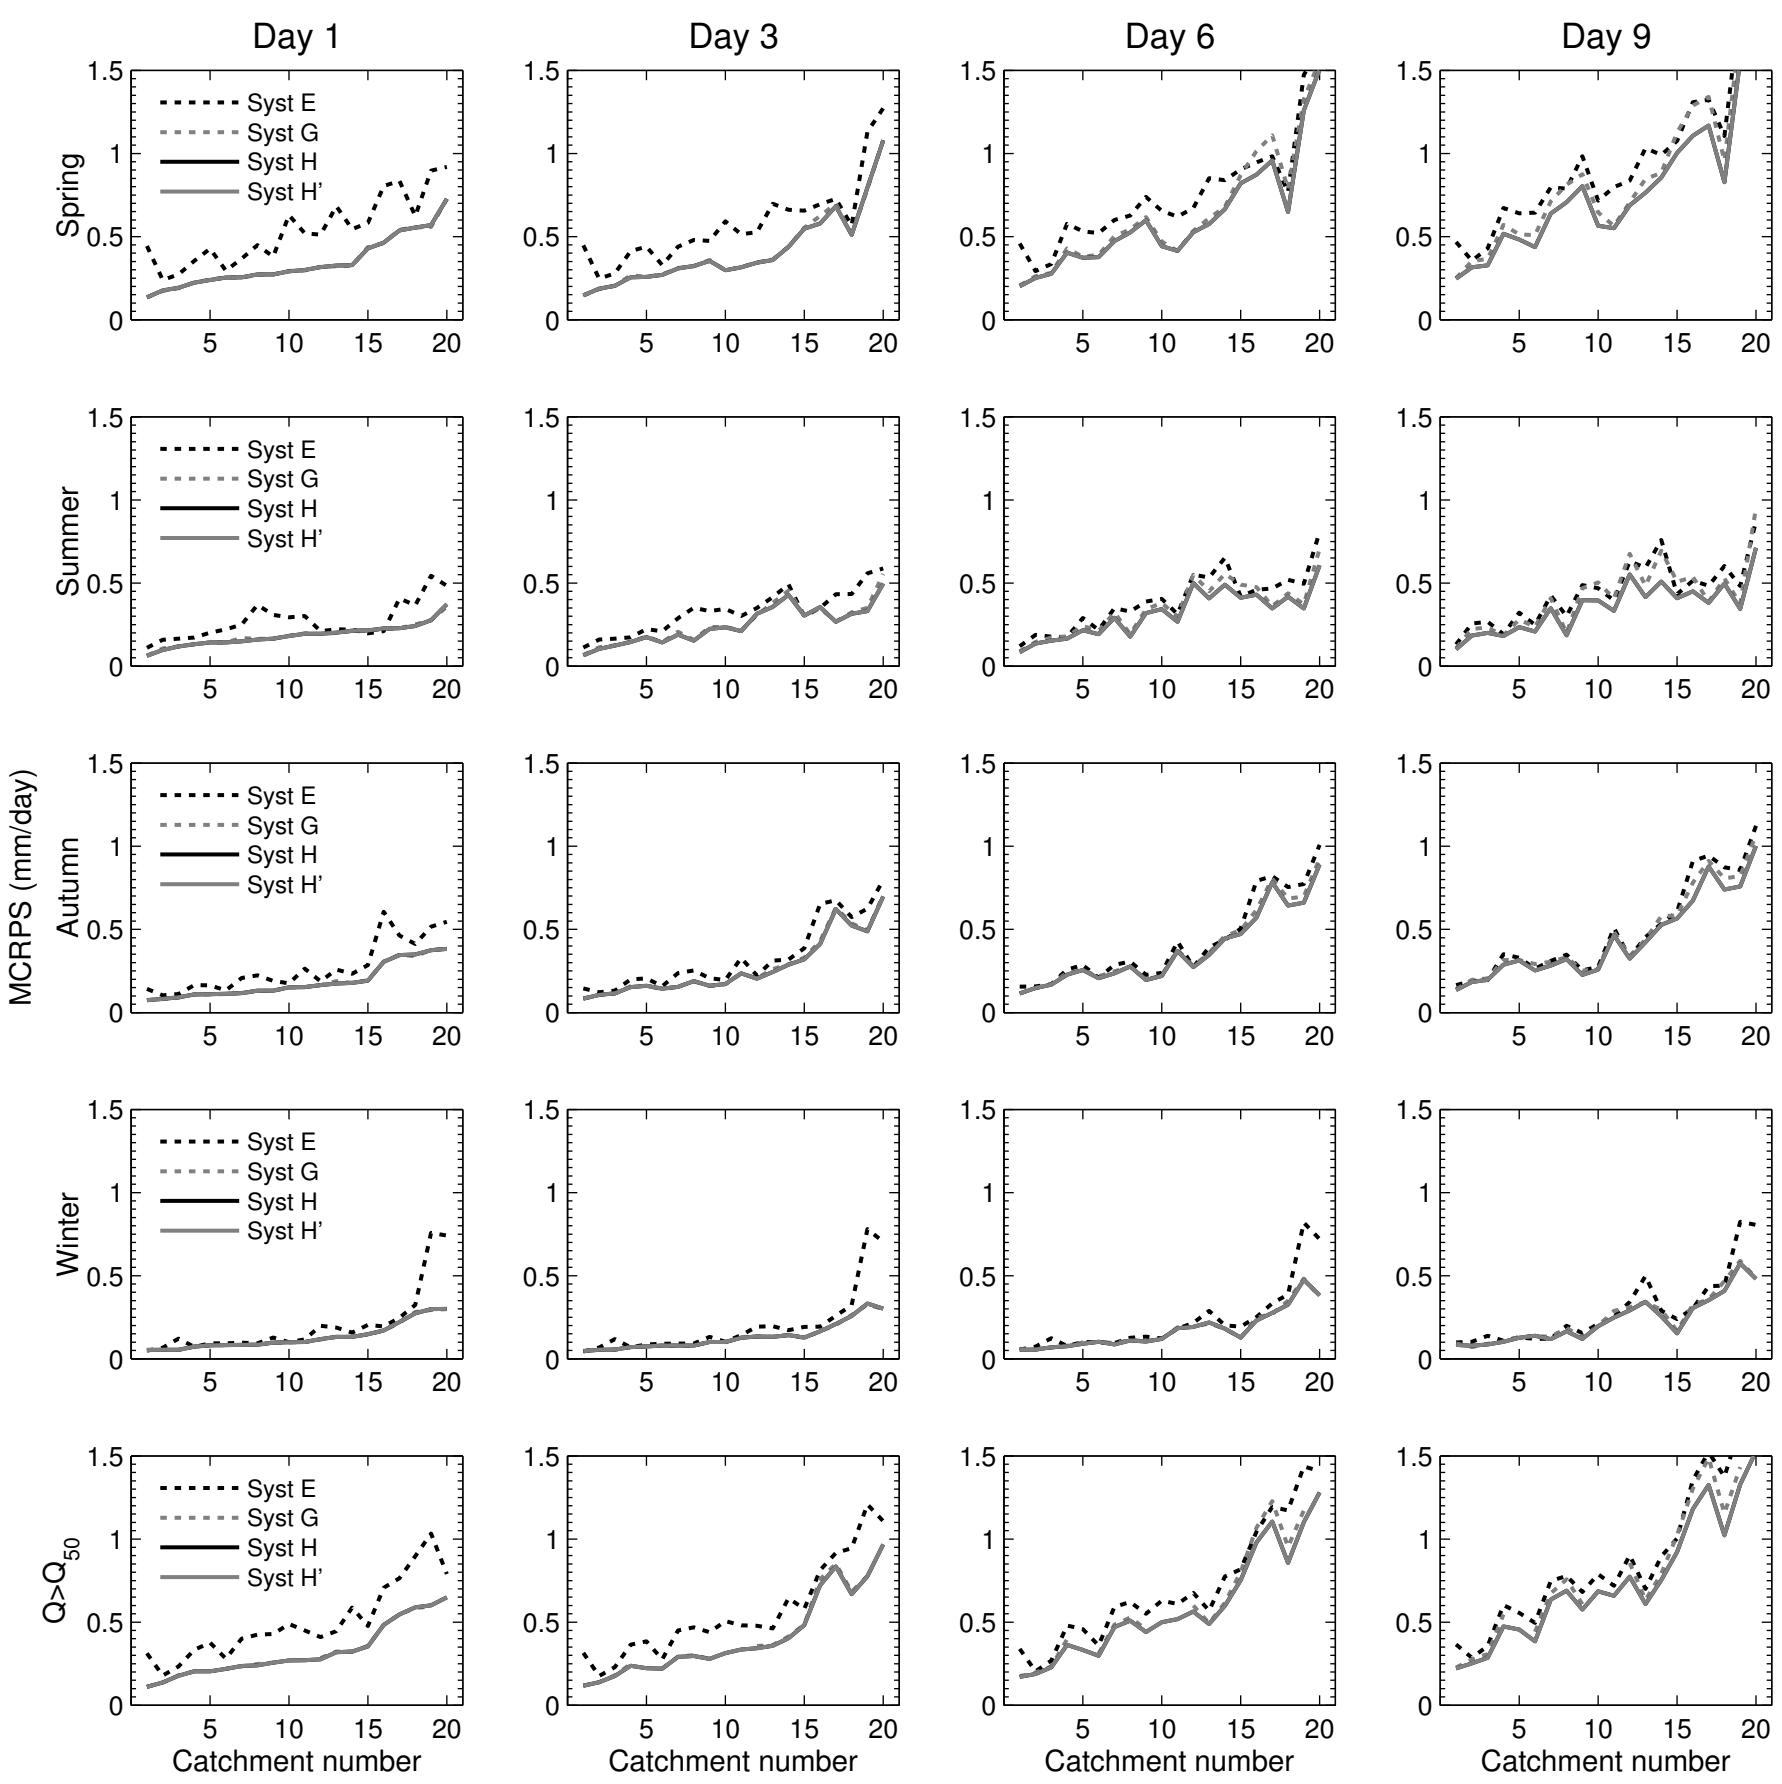

Supplement: Supplementary file 2 [file hess-20-1809-2016-supplement.zip]

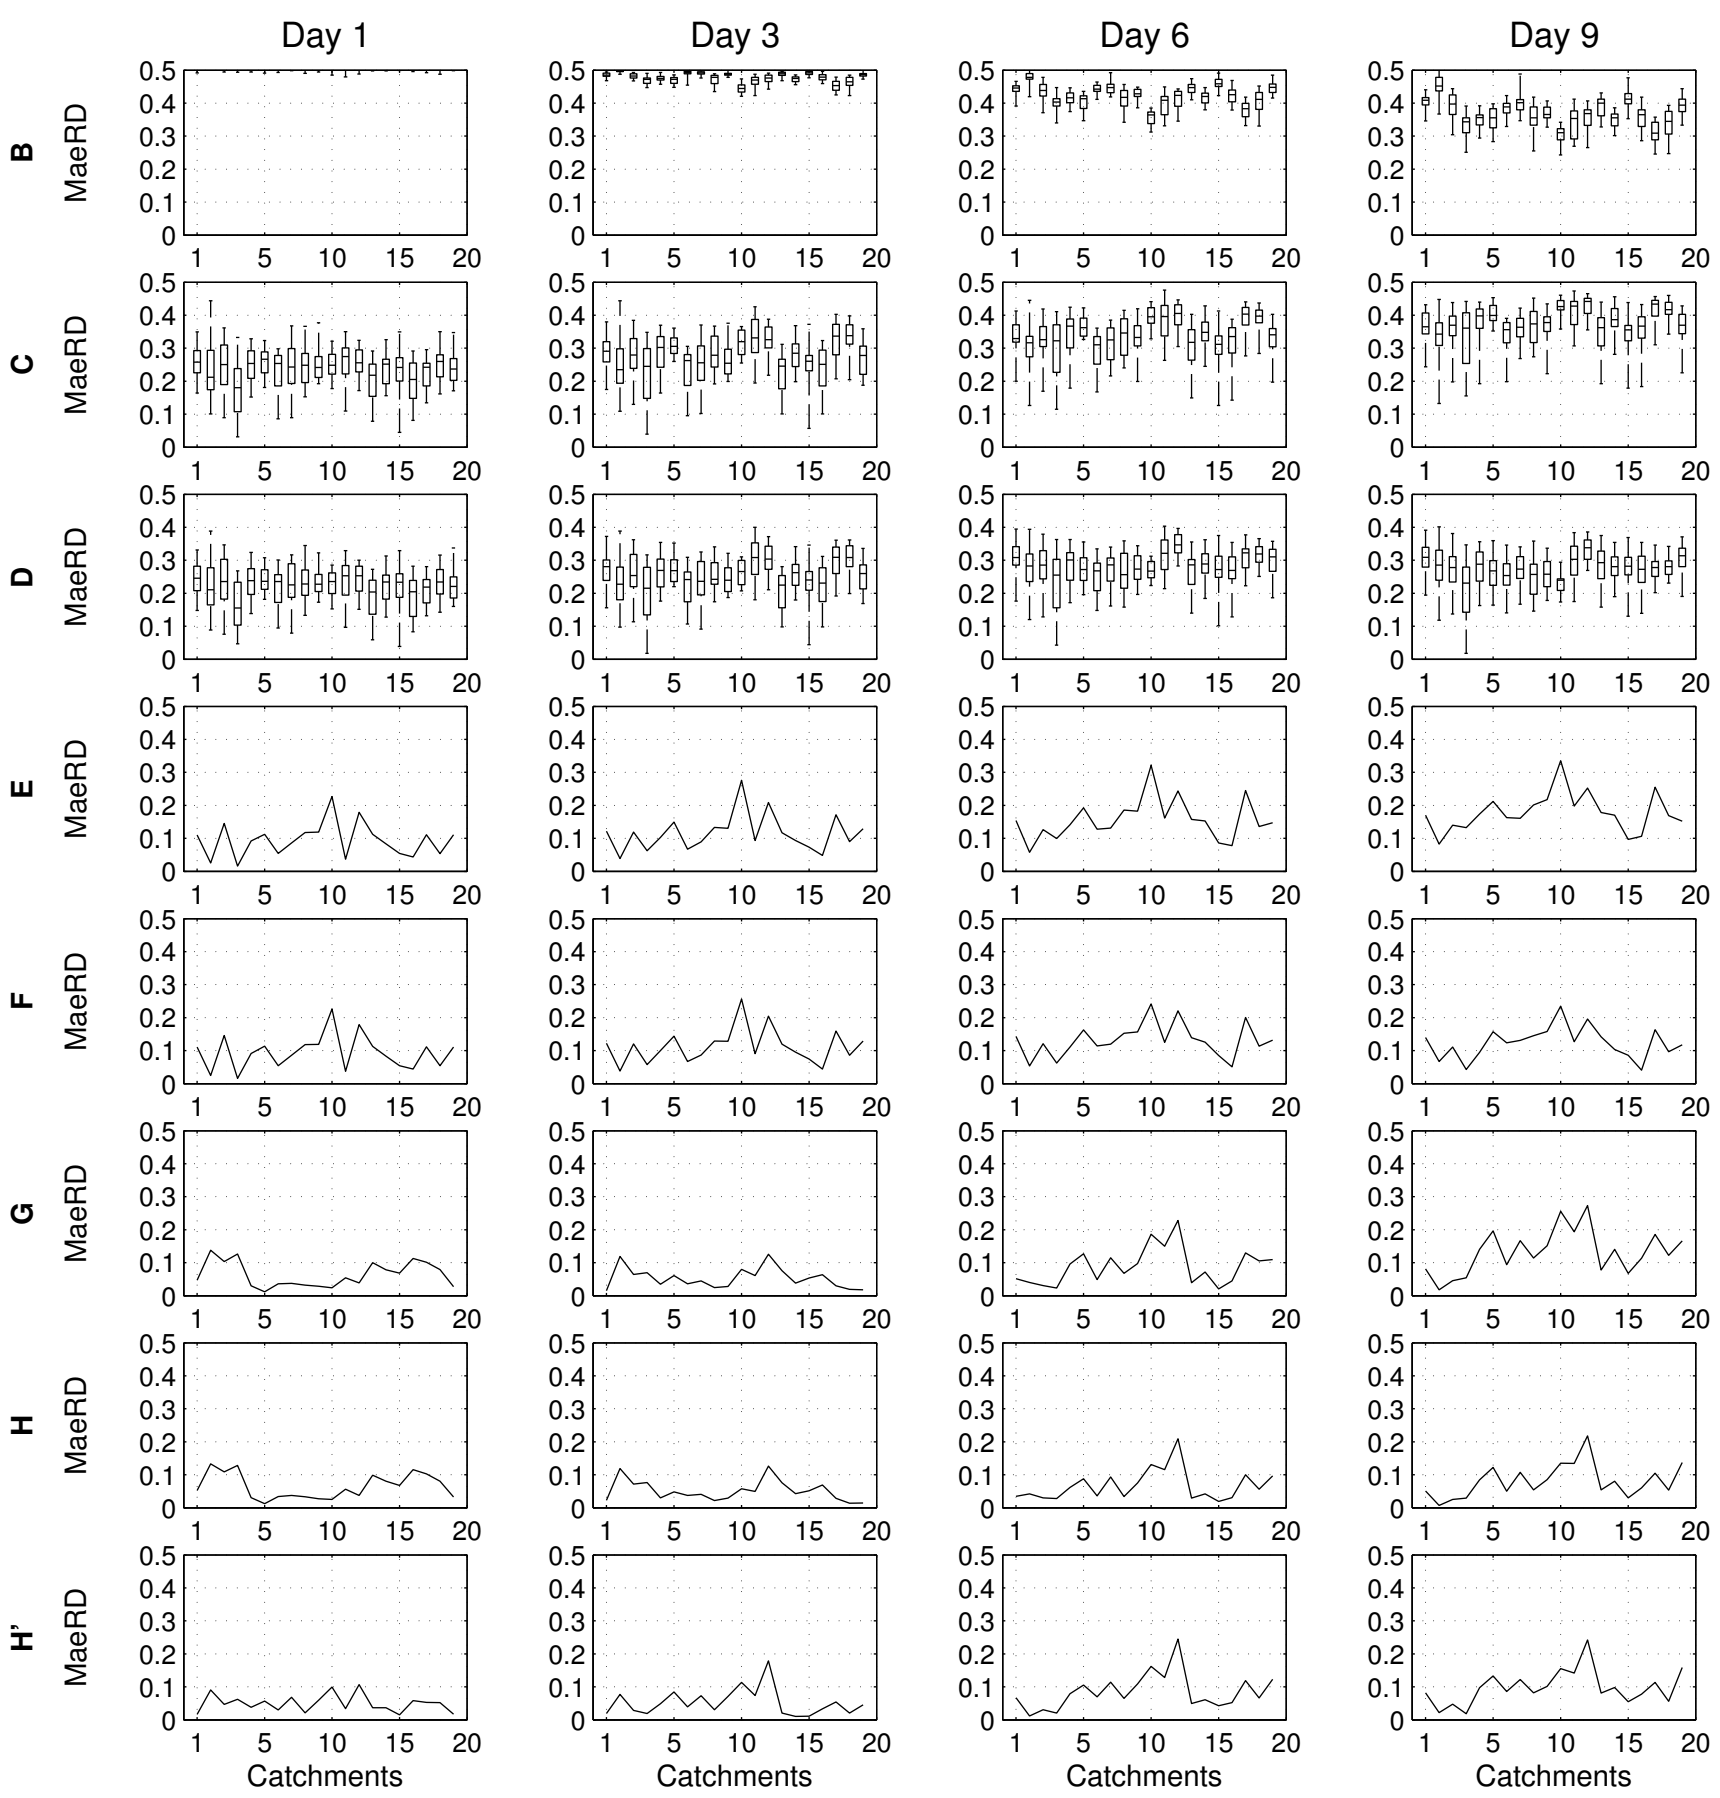

Supplement: Supplementary file 3 [file hess-20-1809-2016-supplement.zip]

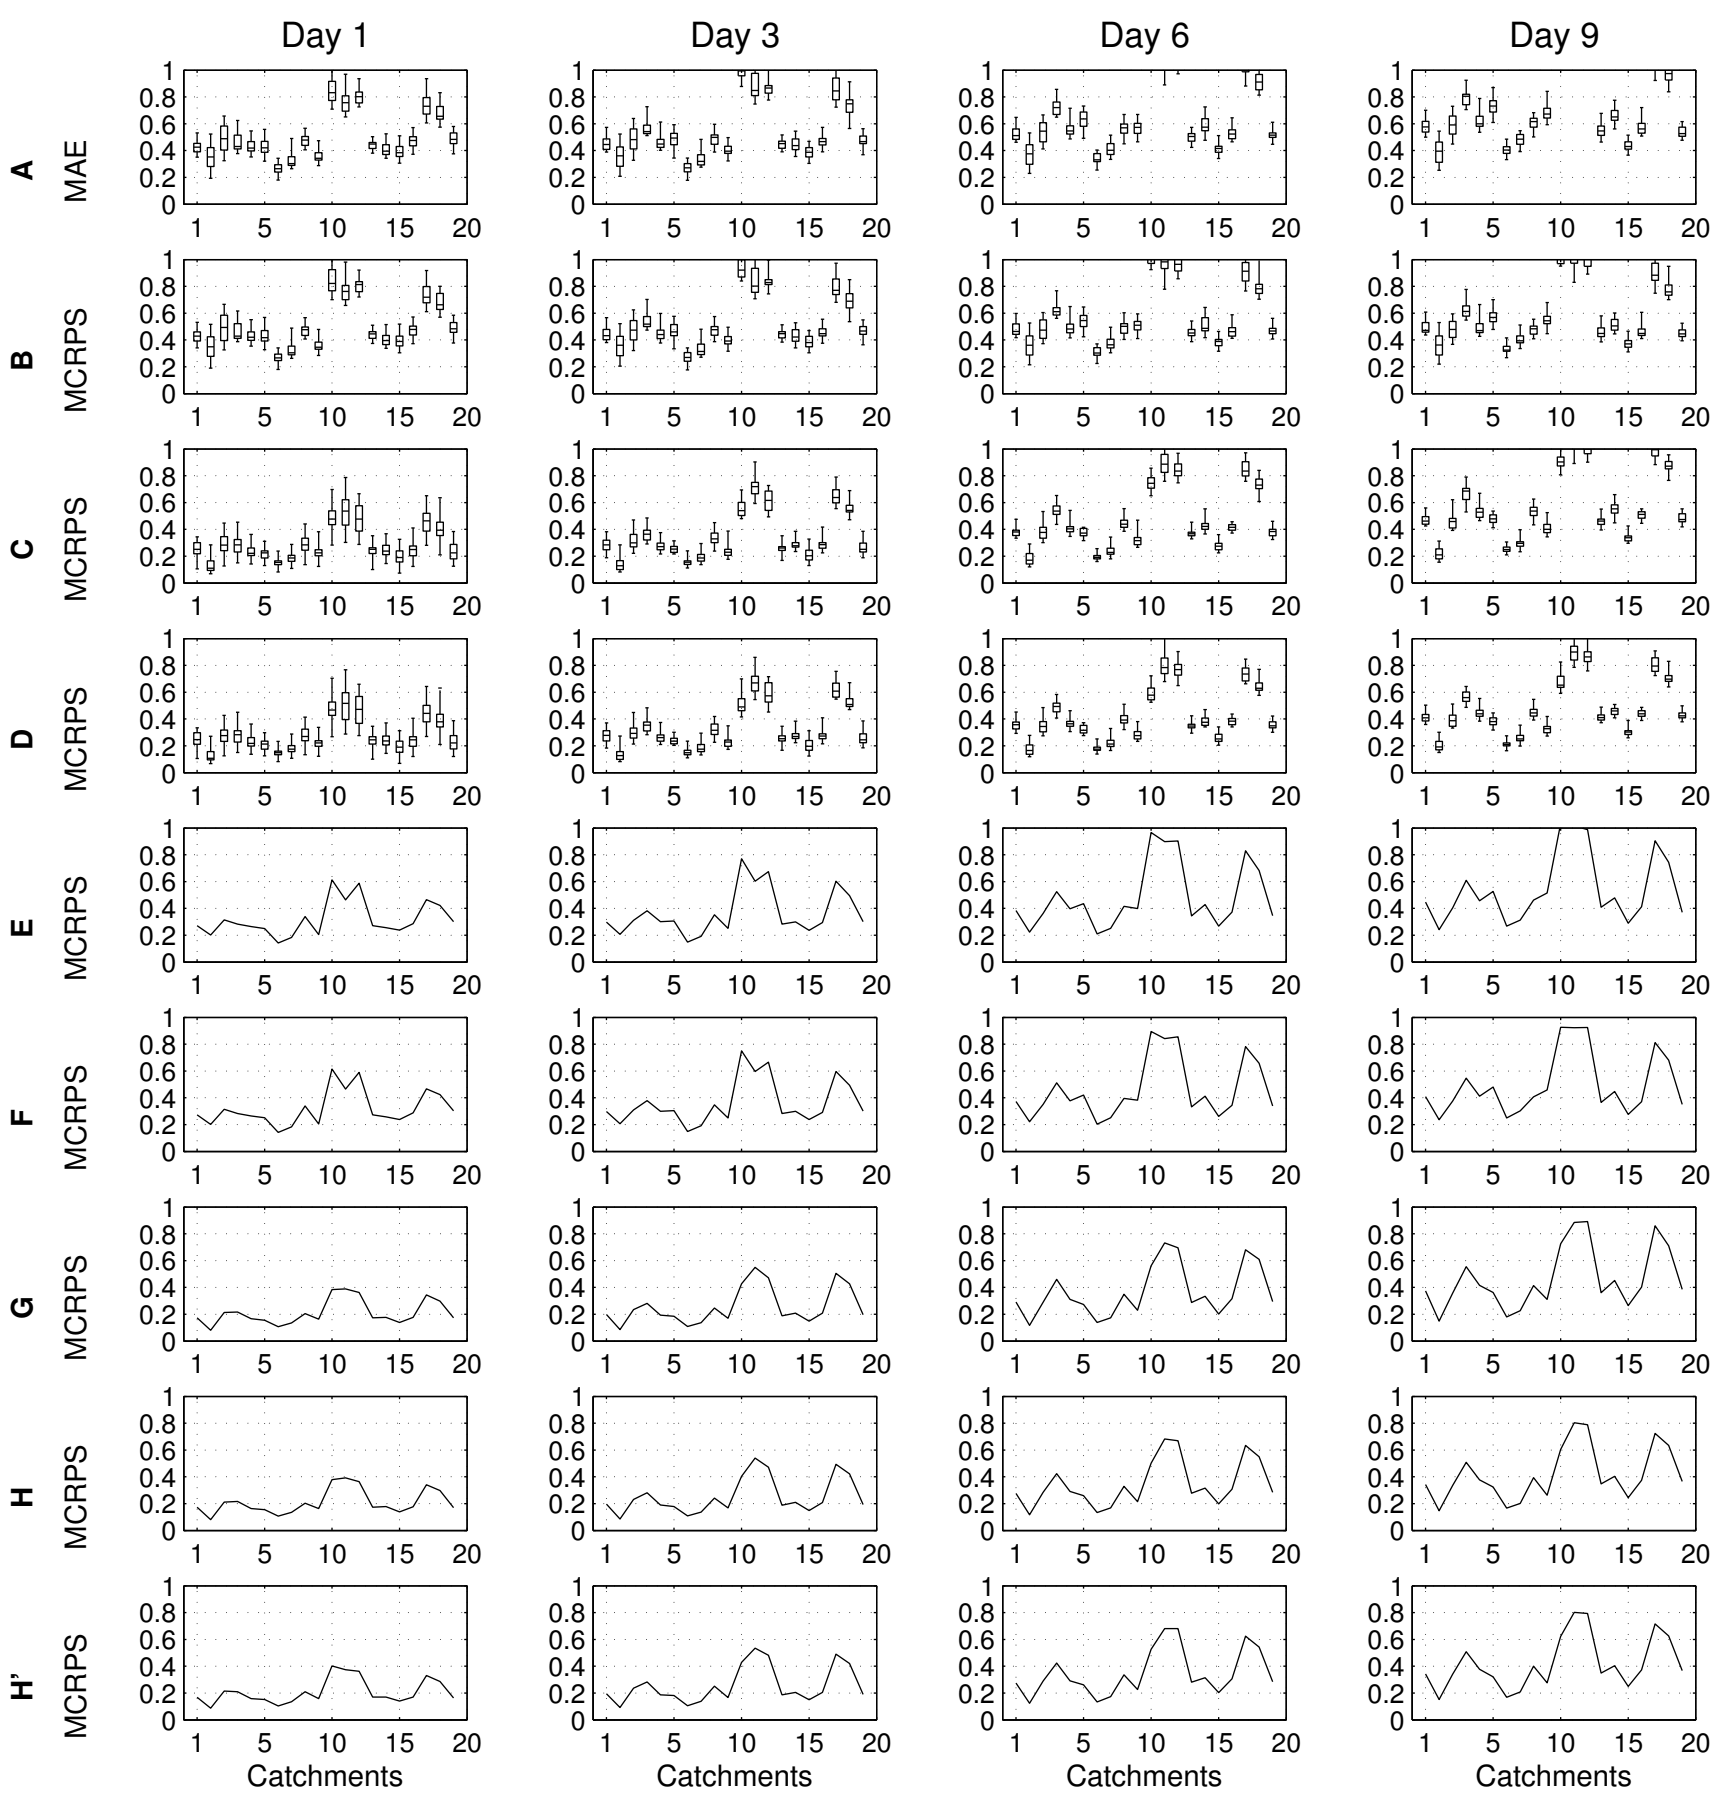

Supplement: Supplementary file 4 [file hess-20-1809-2016-supplement.zip]

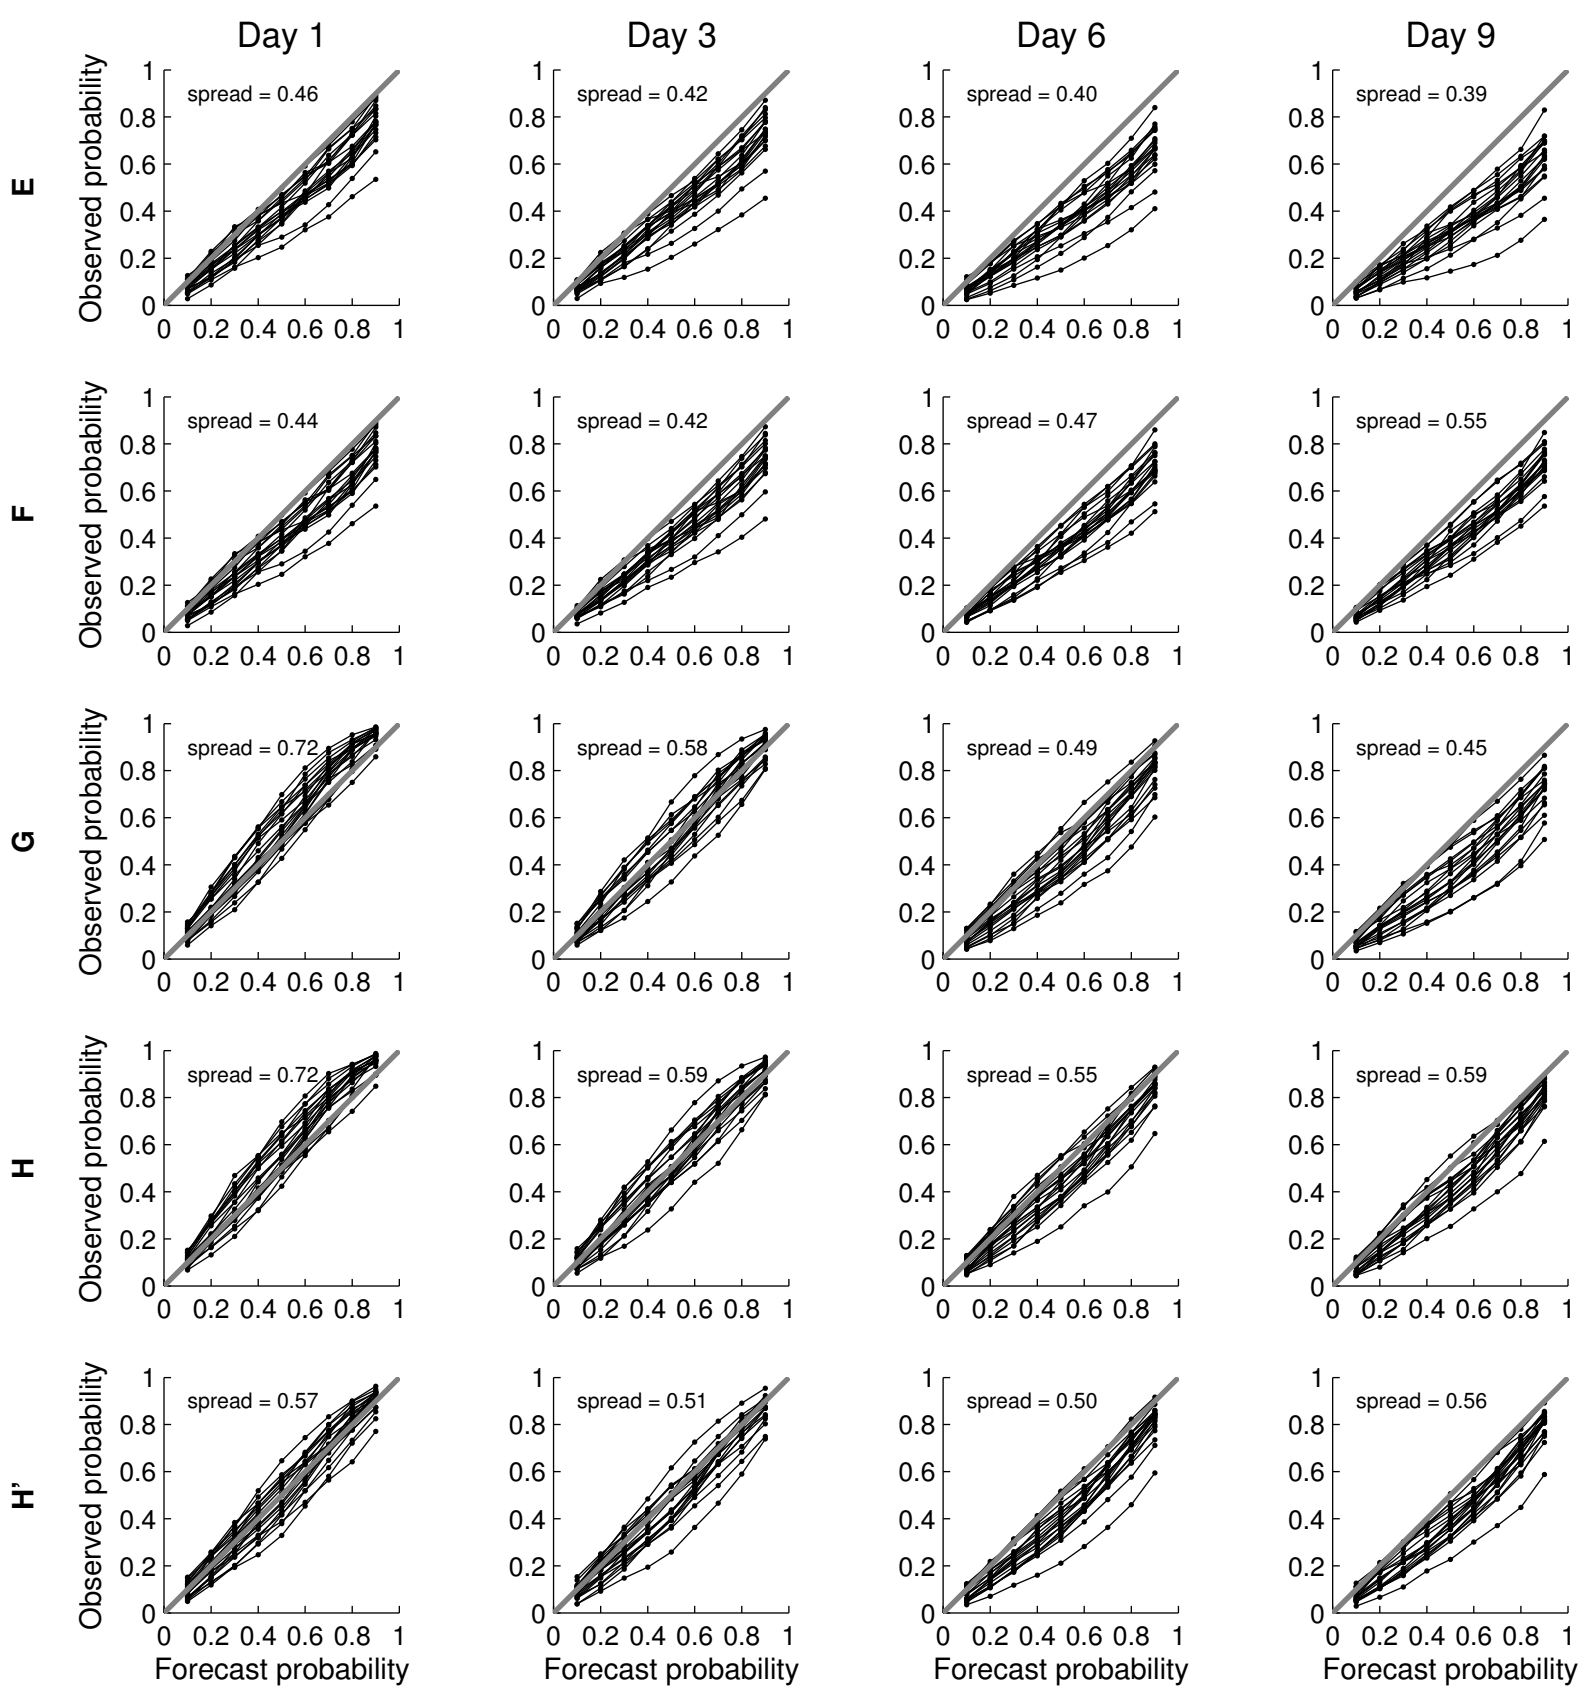

Supplement: Supplementary file 5 [file hess-20-1809-2016-supplement.zip]
